# Supplementary material
Source: PubMed Central journal article supplement (PMC4633727)
Supplement: onc2014450x1.pdf [file onc2014450x1.pdf]

**Table S1: primary CLL cell apoptosis in response to single and combined G1I-PI3K/AKT/mTOR inhibition**

| Patient | Treatment |            |                   |            |                   |            |                   |           |                  |  |
|---------|-----------|------------|-------------------|------------|-------------------|------------|-------------------|-----------|------------------|--|
|         | GANT61    | Dactolisib | GANT61/Dactolisib | Pictilisib | GANT61+Pictilisib | Wortmannin | GANT61/Wortmannin | Rapamycin | GANT61/Rapamycin |  |
| 544     | +         | na         | na                | na         | na                | -          | +                 | +         | +                |  |
| 1753    | ++        | na         | na                | na         | na                | -          | ++                | -         | ++++             |  |
| 7530    | +++       | +          | +++               | +          | +++               | na         | na                | -         | +++              |  |
| 7538    | -         | na         | na                | na         | na                | -          | -                 | -         | +                |  |
| 7577    | +++       | na         | na                | na         | na                | -          | +++               | +         | +++              |  |
| 7579    | -         | na         | na                | na         | na                | +          | +                 | ++        | ++++             |  |
| 7632    | +         | na         | na                | na         | na                | -          | +                 | -         | +                |  |
| 7643    | -         | +          | ++++              | +          | ++++              | na         | na                | +         | ++++             |  |
| 7644    | -         | +          | ++++              | +          | ++++              | na         | na                | +         | ++++             |  |
| 7889    | ++        | +          | ++++              | -          | ++++              | na         | na                | na        | na               |  |
| 7890    | ++        | +          | ++++              | -          | ++++              | na         | na                | na        | na               |  |
| 7913    | +         | ++         | ++                | +          | ++                | na         | na                | na        | na               |  |
| 7914    | ++        | +          | ++                | -          | ++                | na         | na                | na        | na               |  |
| 7915    | +++       | ++         | +++               | -          | +++               | na         | na                | na        | na               |  |

- no effect    + 20-30% apoptosis    ++30-50% apoptosis    +++ 50-75% apoptosis    ++++ >75% apoptosis    na: not analyzed
