# Supplementary material
Source: PubMed Central journal article supplement (PMC4633727)
Supplement: onc2014450x2.pdf [file onc2014450x2.pdf]

**Table S2: molecular and cytogenetic characteristics of primary CLL samples**

| ID   | Zap70 | CD38 | IgVH mutational status | Rai status | Cytogenetics  | Gender |
|------|-------|------|------------------------|------------|---------------|--------|
| 544  | low   | low  | mutated                | I          | del13q        | m      |
| 1753 | low   | low  | mutated                | II         | del13         | f      |
| 7530 | low   | low  | mutated                | I-II       | del13q        | f      |
| 7538 | low   | low  | mutated                | 0          | normal        | f      |
| 7577 | low   | low  | mutated                | II         | del 13q       | m      |
| 7579 | high  | high | unmutated              | I-II       | del11q del13q | f      |
| 7632 | low   | low  | mutated                | 0          | del13q        | f      |
| 7643 | low   | low  | mutated                | 0          | del13q        | f      |
| 7644 | low   | low  | n.d.                   | I          | del13q        | m      |
| 7889 | low   | low  | mutated                | 0-I        | del13q        | f      |
| 7890 | low   | low  | unmutated              | I          | del13q        | m      |
| 7913 | low   | low  | mutated                | 0          | normal        | m      |
| 7914 | low   | low  | mutated                | 0          | del13q        | f      |
| 7915 | low   | low  | mutated                | II         | del13q        | f      |

 = sensitive to combined G1I PI3K/mTOR inhibition

n.d. could not be determined due to technical problems
