# Supplementary material
Source: PubMed Central journal article supplement (PMC4633727)

A) Peritoneal Cavity (12-weeks)

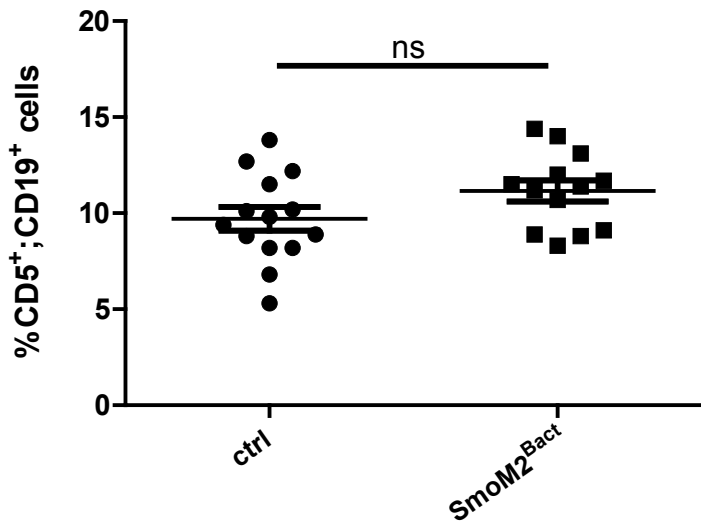

B) Peritoneal Cavity (5 months)

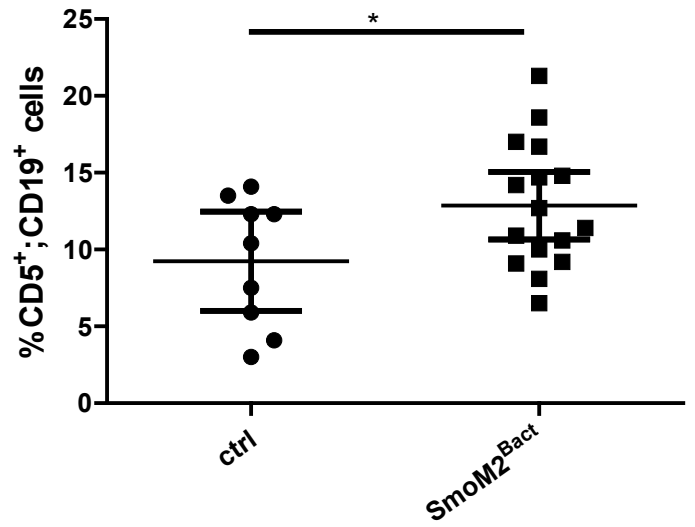

C) Bone Marrow (12-weeks)

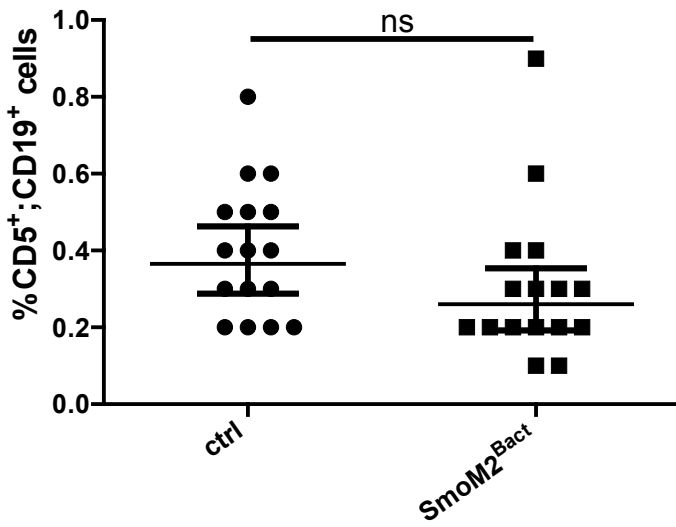

D) Bone Marrow (5 months)

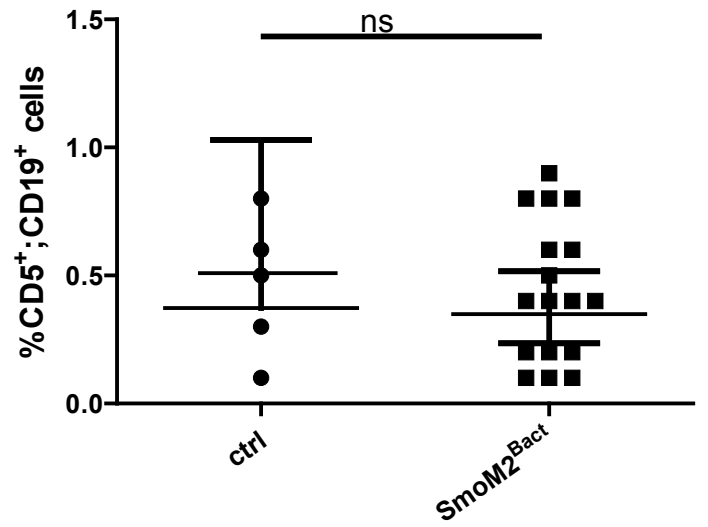

E) Spleen (12-weeks)

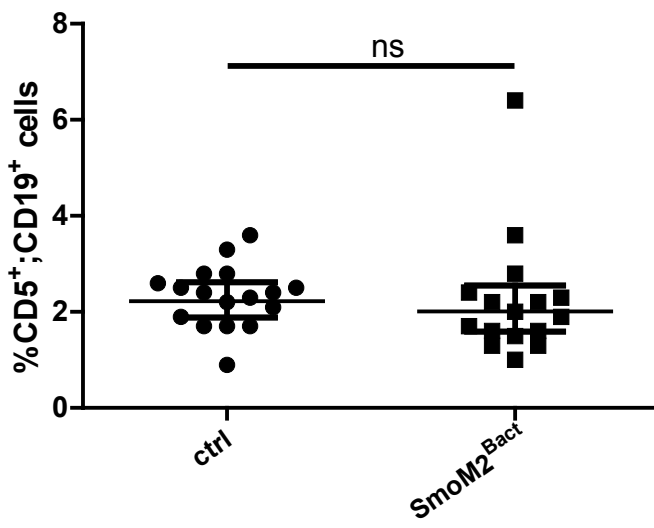

F) Spleen (5 months)

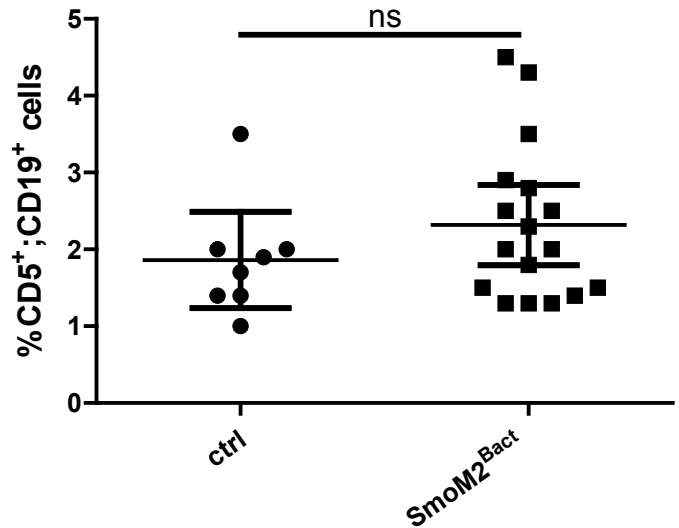

Supplement: onc2014450x3.pdf [file onc2014450x3.pdf]
