# Supplementary material
Source: PubMed Central journal article supplement (PMC4633727)
Supplement: onc2014450x4.pdf [file onc2014450x4.pdf]

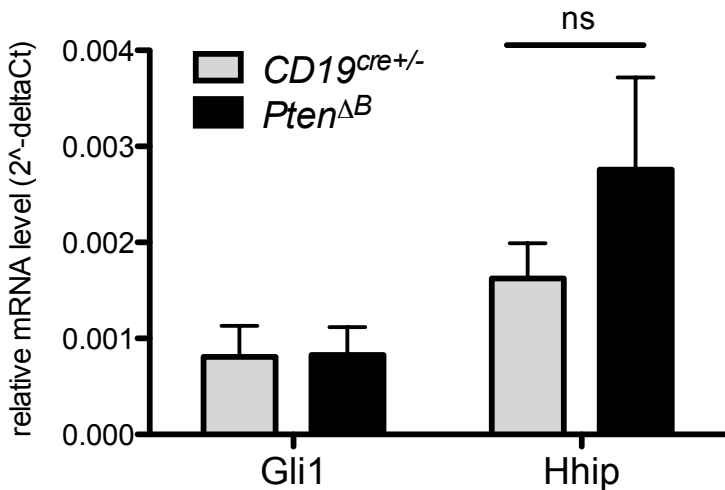

Figure S2: Hh target gene expression in B-cells is not affected by genetic deletion of Pten. qPCR analysis of Gli1 and Hhip mRNA expression in CD19<sup>+</sup> B-cells of control and Pten-deficient mice. ns: p > 0.5
