# Supplementary material
Source: PubMed Central journal article supplement (PMC4633727)
Supplement: onc2014450x5.pdf [file onc2014450x5.pdf]

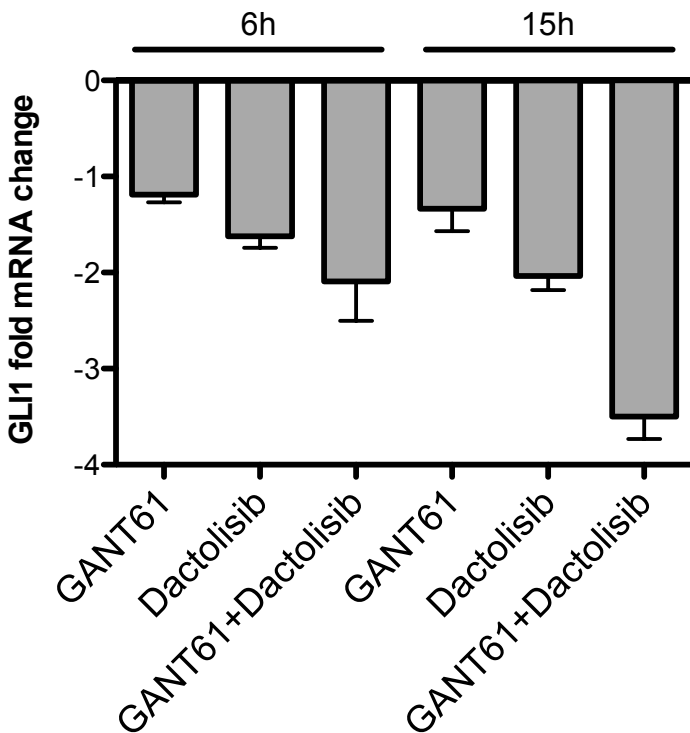

Figure S3: GLI1 mRNA expression is efficiently reduced by combined GANT61+dactolisib treatment. MEC1 cells were treated as indicated for 6h and 15 h, respectively.
